# Supplementary material for: Mining of QTLs for Spring Bread Wheat Spike Productivity by Comparing Spring Wheat Cultivars Released in Different Decades of the Last Century
Source: MDPI journal article supplement (doi:10.3390/plants13081081), 2024-04-12
Supplement: s1 [file s1]

File S1. Manhattan plots and QQ-plots for each of the three years of field study: 2021 - 2023

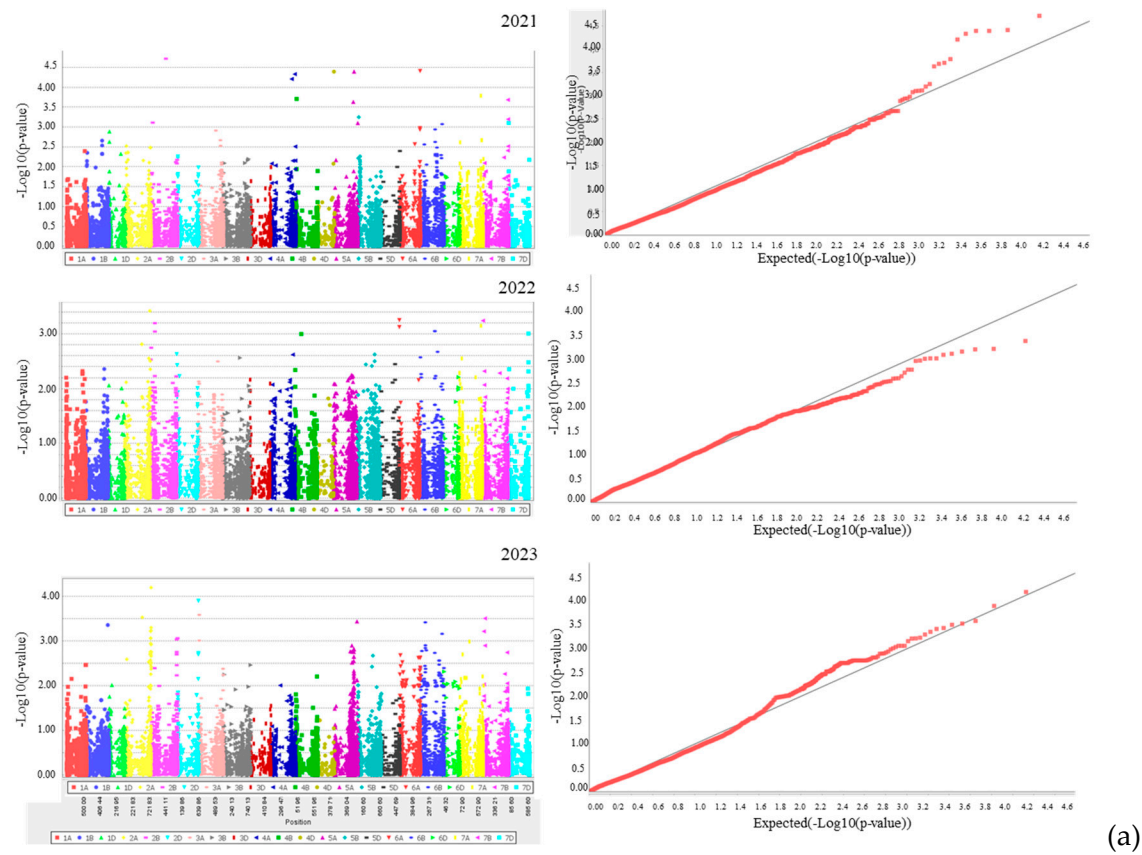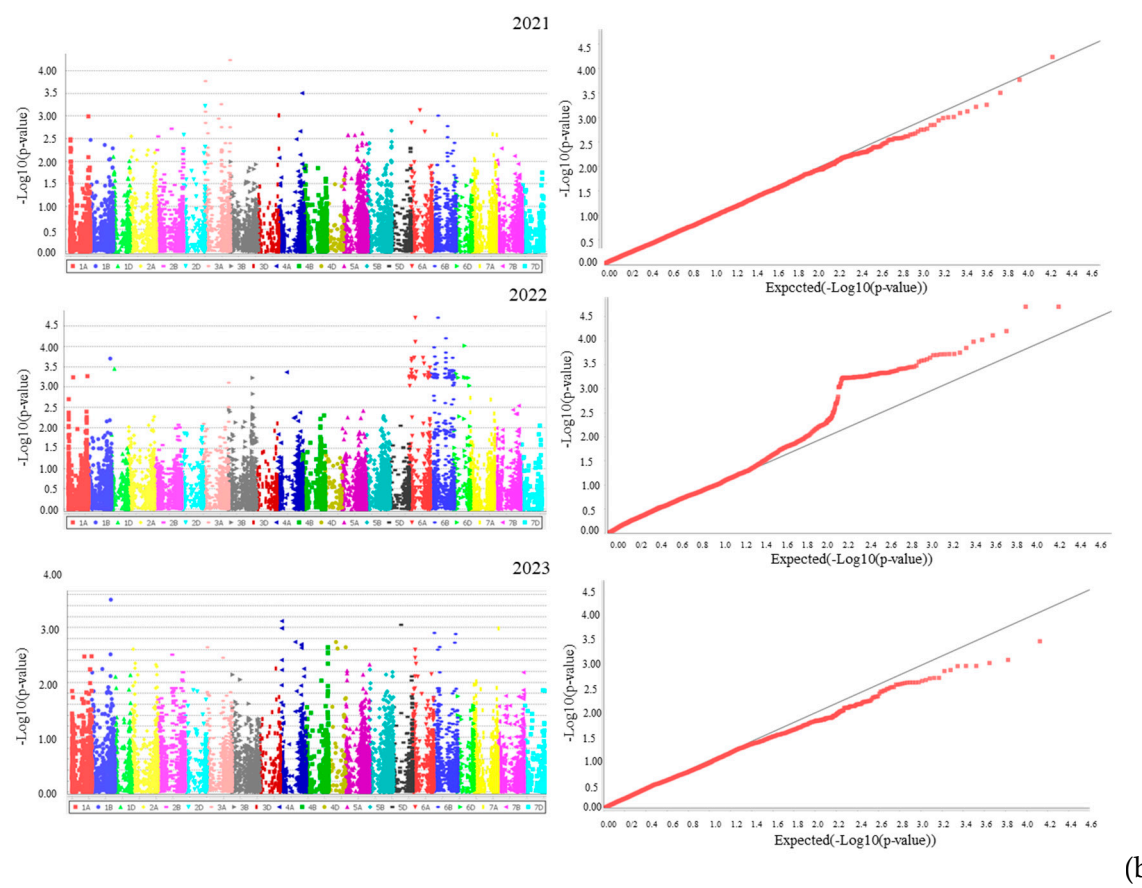

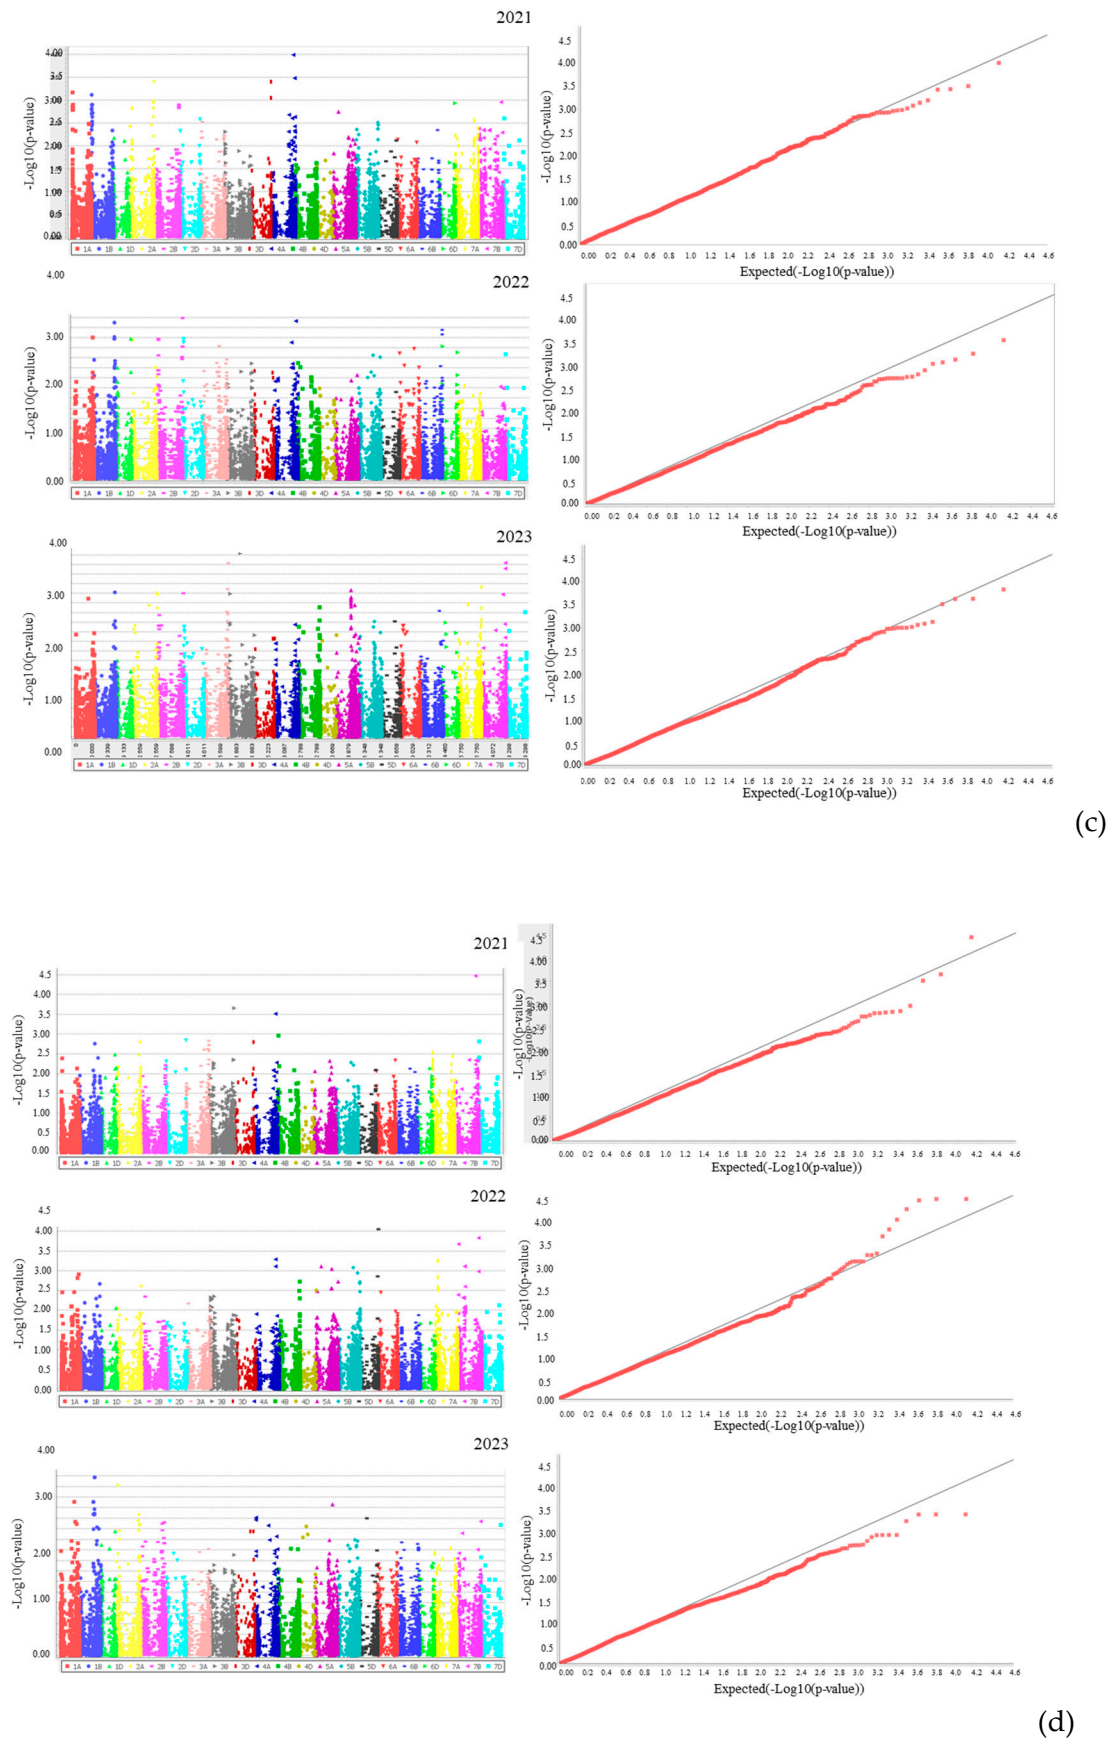

**Figure S1.** Manhattan plots and QQ-plots of 4 agronomic characters: (a) RL; (b) SL; (c) TGW; (d) SN. The red dots and gray straight lines on the QQ-plots indicate the experimental value and the expected value, respectively
