# Supplementary material for: Mining of QTLs for Spring Bread Wheat Spike Productivity by Comparing Spring Wheat Cultivars Released in Different Decades of the Last Century
Source: MDPI journal article supplement (doi:10.3390/plants13081081), 2024-04-12
Supplement: s1 [file s1]

**File S2.**

**Table S1.** Test weight values for the most contrast cultivars

| VIR/IPK<br>catalog No.     | Cultivar                   | Origin. Accession status                | Index,<br>g/L |
|----------------------------|----------------------------|-----------------------------------------|---------------|
| Cultivars with high values |                            |                                         |               |
| Saksonka                   |                            |                                         |               |
| 632855                     |                            | Russia. Landraces                       | 830           |
| 632897                     | Novosibirskaya-89          | Russia. Modern improved cultivars       | 829           |
| 632898                     | Novosolyanskaya            | Russia. Cultivars released in 1951–1991 | 832           |
| 632980/TRI<br>3461         | Sommergrannen              | Germany. Landraces                      | 823           |
| Cultivars with low values  |                            |                                         |               |
| 632920                     | Eritropermum-28            | Russia. Cultivars released in 1951–1991 | 622           |
| 632922/TRI 561             | HeinesJaphet               | Germany. Cultivars released before 1950 | 648           |
| 632923/TRI 562             | Hohenheimer 25             | Germany. Cultivars released before 1950 | 646           |
| 632925/TRI 766             | StrubesWeissaehrigerFruehe | Germany. Cultivars released before 1950 | 635           |
| 632948/TRI 811             | Erbachshofer               | Germany. Cultivars released before 1950 | 647           |
| 632949/TRI 813             | v. RuemkersSommer-Dickkopf | Germany. Cultivars released before 1950 | 638           |

**Table S2.** Grain protein content values for the most contrast cultivars

| VIR/IPK catalog<br>No.     | Cultivar             | Origin. Accession status                | Index,<br>% |
|----------------------------|----------------------|-----------------------------------------|-------------|
| Cultivars with high values |                      |                                         |             |
| 632852                     | Noe-zapadnosibirskii | Russia. Landraces                       | 20.4        |
| 632864                     | Tarskaya-2           | Russia. Cultivars released in 1951–1991 | 18.7        |
| 632879                     | Amurskaya-90         | Russia. Modern improved cultivars       | 18.4        |
| 632920                     | Eritropermum-28      | Russia. Cultivars released in 1951–1991 | 20.7        |
| 632921/TRI 559             | Peragis              | Germany. Cultivars released before 1950 | 18.1        |
| 632922/TRI 561             | HeinesJaphet         | Germany. Cultivars released before 1950 | 19.1        |
| 632923/TRI 562             | Hohenheimer 25       | Germany. Cultivars released before 1950 | 18.8        |

| Cultivars with low values |                       |                                          |      |
|---------------------------|-----------------------|------------------------------------------|------|
| 632828                    | Akmolinka             | Russia. Landraces                        | 12.3 |
| 632829                    | Alenkaya-Uymonskaya   | Russia. Landraces                        | 12.8 |
| 632831                    | Albidum-3700          | Russia. Cultivars released before 1950   | 12.2 |
| 632840                    | Duvanka-501           | Russia. Cultivars released before 1950   | 12.8 |
| 632843                    | Krasnoyarskaya-1103   | Russia. Cultivars released in 1951–1991  | 12.3 |
| 632899                    | Omskaya-11            | Russia. Cultivars released in 1951–1991  | 12.8 |
| 632900                    | Omskaya-9             | Russia. Cultivars released in 1951–1991  | 12.6 |
| 632902                    | Pyrothrix-28          | Russia. Cultivars released in 1951–1991  | 12.5 |
| 632903                    | Priobskaya            | Russia. Cultivars released in 1951–1991  | 12.4 |
| 632904                    | Rodina                | Russia. Cultivars released in 1951–1991  | 11.5 |
| 632907                    | Sibakovskaya-3        | Russia. Cultivars released in 1951–1991  | 12.7 |
| 632909                    | Sibiryachka-4         | Russia. Cultivars released in 1951–1991  | 12.5 |
| 632910                    | Sibiryachka-8         | Russia. Cultivars released in 1951–1991  | 12.8 |
| 632978/TRI 3449           | EndressFichtelgebirgs | Germany. Cultivars released before 1950  | 12.9 |
| 632981/TRI 3664           | Sommergrannen         | Germany. Cultivars released in 1951–1991 | 12.9 |

**Table S3.** Sedimentation values for the most contrast cultivars

| VIR/IPK catalog<br>No.     | Cultivar                   | Origin. Accession status                 | Index<br>, mL |
|----------------------------|----------------------------|------------------------------------------|---------------|
| Cultivars with high values |                            |                                          |               |
| 632871                     | Tsezium-31                 | Russia. Cultivars released before 1950   | 80            |
| 632876                     | Altayskaya 60              | Russia. Modern improved cultivars        | 80            |
| 632887                     | Irtyskanka-10              | Russia. Cultivars released in 1951–1991  | 81            |
| 632949/TRI 813             | v. RuemkersSommer-Dickkopf | Germany. Cultivars released before 1950  | 80            |
| 632995/TRI 8146            | Probat                     | Germany. Cultivars released in 1951–1991 | 80            |
| 633006/TRI 9529            | Kleiber                    | Germany. Cultivars released in 1951–1991 | 82            |
| Cultivars with low values  |                            |                                          |               |
| 633007/TRI 9731            | Carola                     | Germany. Cultivars released in 1951–1991 | 14            |
| 633009/TRI 10975           | Bali                       | Germany. Cultivars released in 1951–1991 | 16            |
| 633010/TRI 10976           | St.Samos                   | Germany. Cultivars released in 1951–1991 | 16            |

**Table S4.** Grain ash content values for the most contrast cultivars

| VIR/IPK catalog<br>No. | Cultivar | Origin. Accession status | Index, % |
|------------------------|----------|--------------------------|----------|
|------------------------|----------|--------------------------|----------|

| Cultivars with high values |                      |                                         |      |
|----------------------------|----------------------|-----------------------------------------|------|
| 632855                     | Saksonka             | Russia. Landraces                       | 1.68 |
| 632874                     | Selenga              | Russia. Cultivars released in 1951–1991 | 1.68 |
| 632884                     | Grekum-114           | Russia. Cultivars released in 1951–1991 | 1.53 |
| 632888                     | Kantegirskaya-89     | Russia. Modern improved cultivars       | 1.68 |
| 632901                     | Orenburgskaya-7      | Russia. Cultivars released in 1951–1991 | 1.67 |
| 632915                     | Fora                 | Russia. Modern improved cultivars       | 1.64 |
| 632938/TRI 798             | BergersGiersdorfer   | Germany. Cultivars released before 1950 | 1.69 |
| 632943/TRI 805             | RaeckesWeisspelziger | Germany. Cultivars released before 1950 | 1.65 |
| Cultivars with low values  |                      |                                         |      |
| 632920                     | Eritrospermum-28     | Russia. Cultivars released in 1951–1991 | 2.80 |
| 632922/TRI 561             | HeinesJaphet         | Germany. Cultivars released before 1950 | 2.64 |
| 633008/TRI 10174           | Solo                 | Russia. Cultivars released in 1951–1991 | 2.64 |

**Table S5.** Flour color values for the most contrast cultivars

| VIR/IPK catalog<br>No.     | Cultivar         | Origin. Accession status                 | Index, % |
|----------------------------|------------------|------------------------------------------|----------|
| Cultivars with high values |                  |                                          |          |
| 632831                     | Albidum-3700     | Russia. Cultivars released before 1950   | 84.1     |
| 632874                     | Selenga          | Russia. Cultivars released in 1951–1991  | 83.2     |
| 632880                     | Angara-86        | Russia. Modern improved cultivars        | 83.1     |
| 632884                     | Grekum-114       | Russia. Cultivars released in 1951–1991  | 83.0     |
| 632888                     | Kantegirskaya-89 | Russia. Modern improved cultivars        | 83.7     |
| 632983/TRI 4931            | HeinesFasan      | Germany. Cultivars released in 1951–1991 | 83.1     |
| Cultivars with low values  |                  |                                          |          |
| 632840                     | Duvanka-501      | Russia. Cultivars released before 1950   | 75.0     |
| 632848                     | Miltrum 553      | Russia. Cultivars released before 1950   | 76.6     |
| 632922/TRI 561             | HeinesJaphet     | Germany. Cultivars released before 1950  | 74.8     |
